# Supplementary material for: De Novo Transcriptome Assembly and Analyses of Gene Expression during Photomorphogenesis in Diploid Wheat Triticum monococcum
Source: PLoS One. 2014 May 12;9(5):e96855. doi: 10.1371/journal.pone.0096855 (PMC4018402; doi:10.1371/journal.pone.0096855)
Supplement: Table S8 — A list of DV92 and G3116 transcripts homologous to the barley genes overlapping the 9,800 SNP set. Table includes DV92 and G3116 transcript IDs, homologous barley gene ID, RPKM values, respective p-value scores, putative gene function annotation and the resultant SNP variant effect with reference to the barley gene models. (XLSX) [file pone.0096855.s017.xlsx]

## Sheet: Table-S8
Table S8:A list of DV92 and G3116 transcripts homologous to the barley genes overlapping the 9,800 SNP set. Table includes DV92 and G3116 transcript IDs, homologous barley gene ID, RPKM values, respective p-value scores, putative gene function annotation and the resultant SNP variant effect with reference to the barley gene models.
DV92_ID	G3116_ID	Barley_gene_id	DV92_Ave_Dark	DV92_Ave_Light	G3116_Ave_Dark	G3116_Ave_Light	log2_DV92_AVE_Dark	log2_DV92_AVE_Light	log2_G3116_AVE_Dark	log2_G3116_AVE_Dark	DV92 pvalue	DV92_is_diff	G3116 pvalue	G3116_is_diff	Annotation	SNP variant Effect (VEP)
TmoDV92v1_016285	TmoG3116v1_056569	MLOC_52613	98.11	15.7	43.2186	21.5112	6.61633	3.97269	5.43358	4.42702	5.22318e-23	1	4.19179e-06	1	CASP-like membrane protein	missense variant
TmoDV92v1_060614	TmoG3116v1_078552	MLOC_16522	61.91	9.58	55.2028	6.37582	5.9521	3.26003	5.78667	2.67261	2.0027e-18	1	3.01099e-25	1	Auxin-responsive family protein	downstream gene variant
TmoDV92v1_024678	TmoG3116v1_056299	MLOC_75899	74.07	16.72	102.28	16.2713	6.21082	4.0635	6.67638	4.02426	1.74204e-15	1	1.44451e-32	1	Novel protein carrying the DUF1644 domain	downstream gene variant
TmoDV92v1_024658	TmoG3116v1_009170	MLOC_71749	61.37	12.24	22.4967	4.16527	5.93946	3.61353	4.49164	2.05841	1.31529e-15	1	8.2355e-10	1	Xyloglucan endo-transglycosylase, C-terminal	3-prime UTR variant
TmoDV92v1_008856	TmoG3116v1_004945	MLOC_81109	1.51	27.62	8.97538	428.587	0.594549	4.78764	3.16597	8.74344	3.91531e-15	1	4.70189e-138	1	Chlorophyll a/b binding protein	coding sequence variant
TmoDV92v1_009786	TmoG3116v1_037241	MLOC_21811	4.61	43.22	5.47231	34.7468	2.20477	5.43363	2.45215	5.11881	0.031407	1	6.90221e-14	1	RUBISCO small chain	splice region variant, intron variant, downstream variant
TmoDV92v1_013691	TmoG3116v1_005920	MLOC_22224	5.28	30.76	2.80564	30.8793	2.40054	4.94298	1.48833	4.94857	3.5399e-10	1	2.90673e-16	1	Novel	coding sequence variant
TmoDV92v1_023166	TmoG3116v1_008058	MLOC_74856	4.48	46.24	1.60487	12.2055	2.1635	5.53107	0.682458	3.60946	2.50993e-18	1	1.68438e-06	1	Novel	5-prime UTR, synonymous and missense variants
TmoDV92v1_019492	TmoG3116v1_010054	MLOC_6738	35.42	196.22	2.67218	11.5603	5.14649	7.61633	1.41802	3.5311	3.16733e-25	1	0.000117973	1	Photosystem I reaction center subunit psaK	splice donor variant
TmoDV92v1_010211	TmoG3116v1_059326	MLOC_53469	35.62	299.39	2.67651	29.3232	5.15462	8.22588	1.42035	4.87397	1.45336e-39	1	6.92861e-16	1	Photosystem I reaction center subunit psaH	upstream gene variant
TmoDV92v1_074634	TmoG3116v1_096822	MLOC_10423	6.76	120.28	5.07734	148.026	2.75702	6.91025	2.34407	7.20971	1.65614e-39	1	3.55825e-69	1	Mitochondrial transcription termination related	5-prime UTR, synonymous and missense variants
